# Supplementary material for: Secreted exosomes induce filopodia formation
Source: eLife journal article supplement (doi:10.7554/elife.101673), 2024-10-18
Supplement: fig2-figsupp1-data1 [file Figure 2_Figure Supplement 1_Source Data 1.pdf › Figure 2_Figure Supplement 1_Source Data 1.pdf]

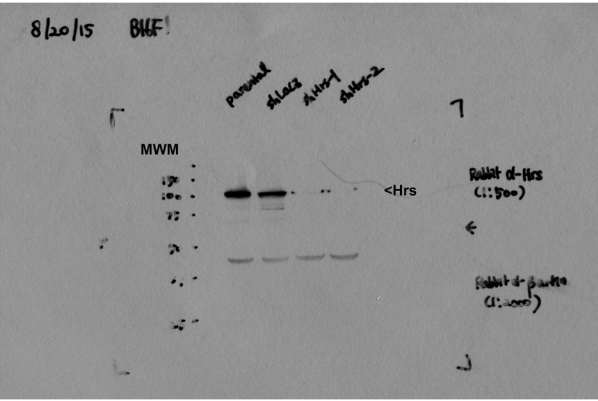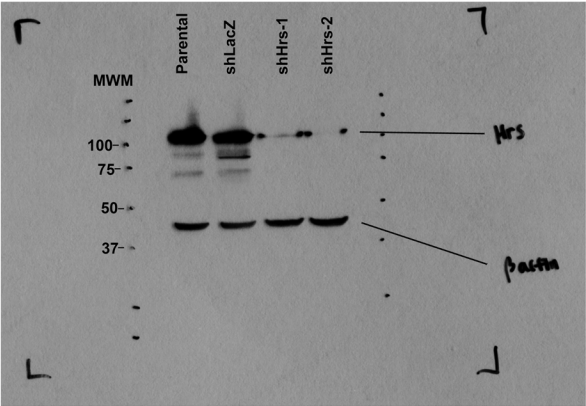

**Figure 2, Figure Supplement 1, Source data 1.** Original exposures on film of membranes corresponding to Figure 2, Figure supplement 1, panel A. Rainbow molecular weight markers were employed and noted on the film with marker.
