# Supplementary material for: Secreted exosomes induce filopodia formation
Source: eLife journal article supplement (doi:10.7554/elife.101673), 2024-10-18
Supplement: fig2-figsupp1-data3 [file Figure 2_Figure Supplement 1_Source Data 3.pdf › Figure 2_Figure Supplement 1_Source Data 3.pdf]

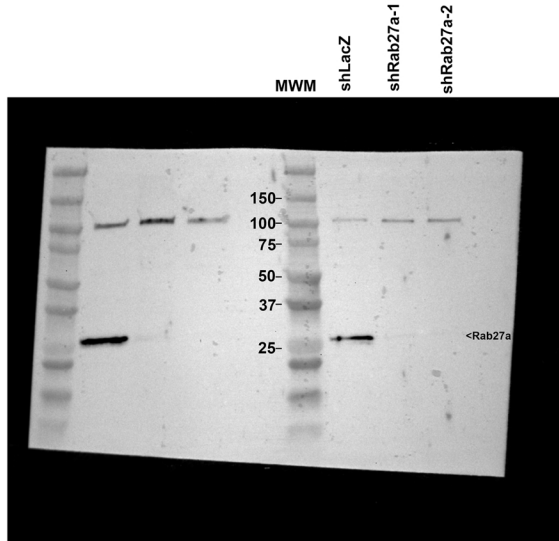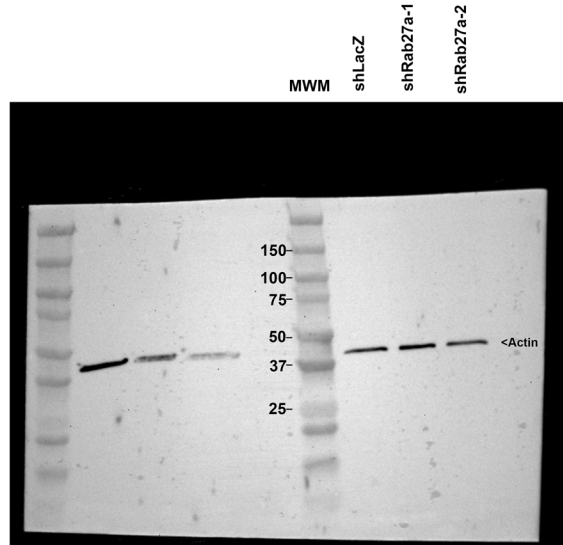

**Figure 2, Figure Supplement 1, Source Data 3.** Original membranes corresponding to Figure 2 Figure Supplement 1, panel B. Rainbow molecular weight markers were employed. Right side of the blots have the relevant total cell lysate samples.
