# Supplementary material for: Secreted exosomes induce filopodia formation
Source: eLife journal article supplement (doi:10.7554/elife.101673), 2024-10-18
Supplement: fig2-figsupp1-data5 [file Figure 2_Figure Supplement 1_Source Data 5.pdf › Figure 2_Figure Supplement 1_Source Data 5.pdf]

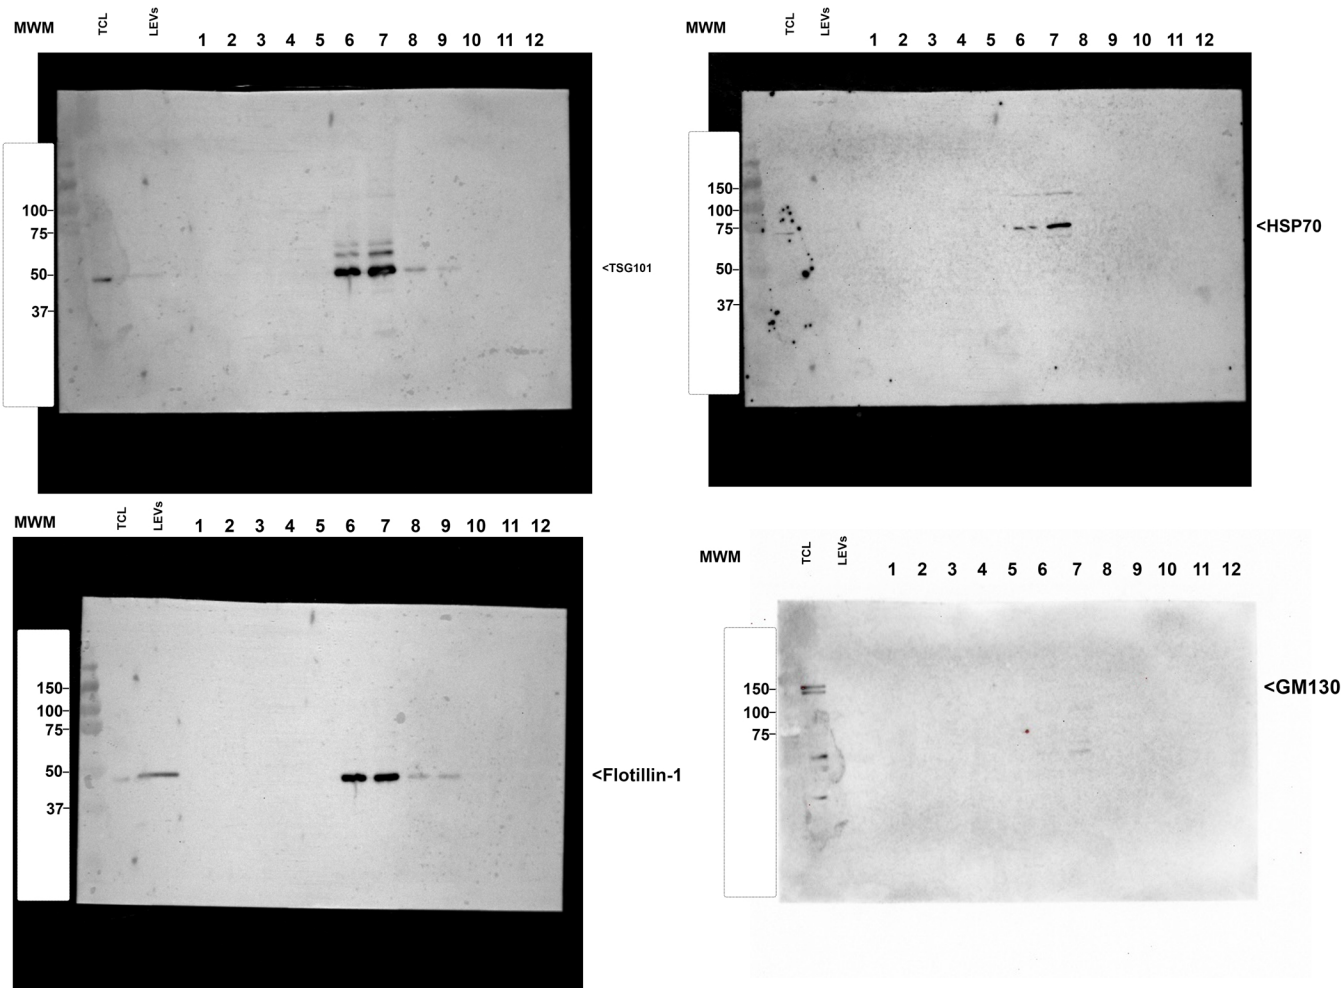

**Figure 2, Figure Supplement 1, Source Data 5.** Original membranes corresponding to Figure 2 Figure Supplement 1D. Rainbow molecular weight markers were employed. Left lanes show total cell lysate and large extracellular vesicles, then following 12 lanes show 1 mL fractions from the density gradient purification, from least to most dense.
