# Supplementary material for: Secreted exosomes induce filopodia formation
Source: eLife journal article supplement (doi:10.7554/elife.101673), 2024-10-18
Supplement: fig2-figsupp2-data1 [file Figure 2_Figure Supplement 2_Source Data 1.pdf › Figure 2_Figure Supplement 2_Source Data 1.pdf]

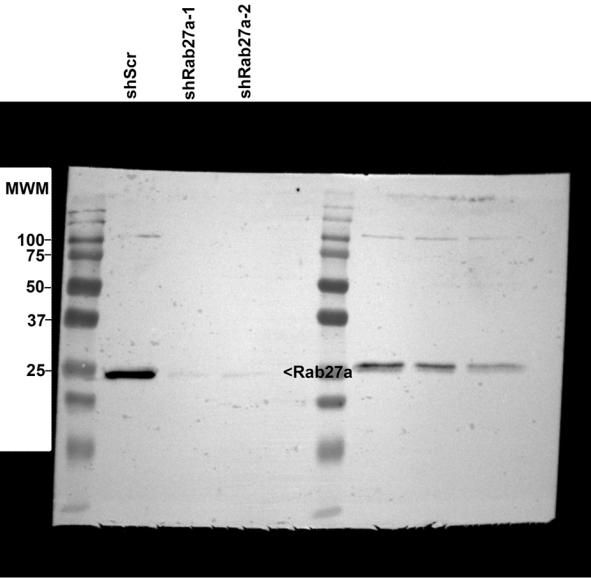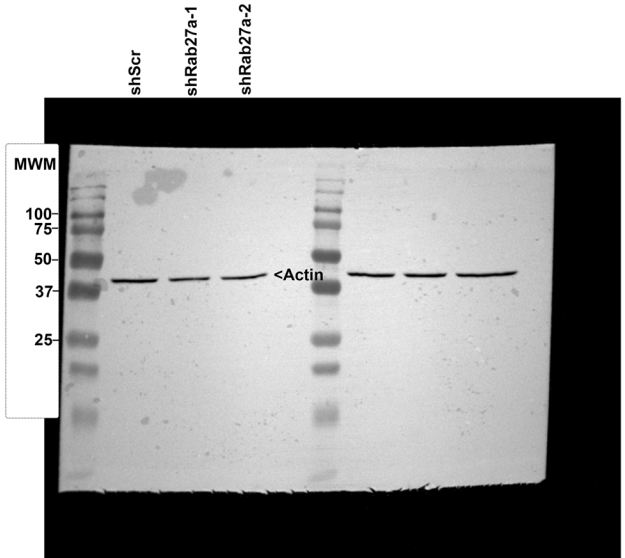

**Figure 2, Figure Supplement 2, Source data 2.** Original membranes corresponding to Figure 2 Figure Supplement 2, panel A. Rainbow molecular weight markers were employed. Left side of the membranes show relevant total cell lysate samples.
