# Supplementary material for: Secreted exosomes induce filopodia formation
Source: eLife journal article supplement (doi:10.7554/elife.101673), 2024-10-18
Supplement: fig3-figsupp2-data1 [file Figure 3_Figure Supplement 2_Source Data 1.pdf › Figure 3_Figure Supplement 2_Source Data 1.pdf]

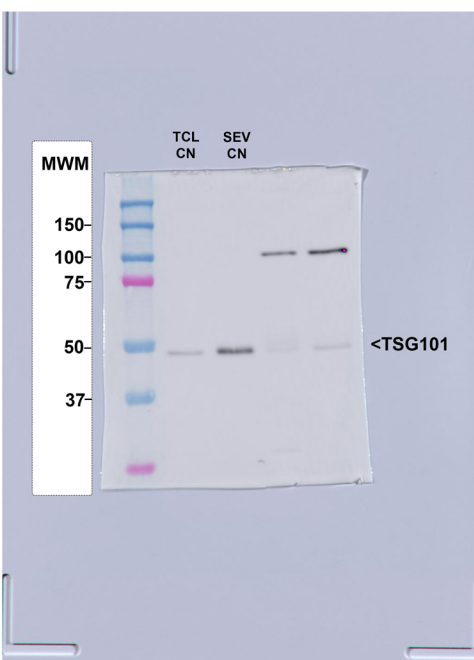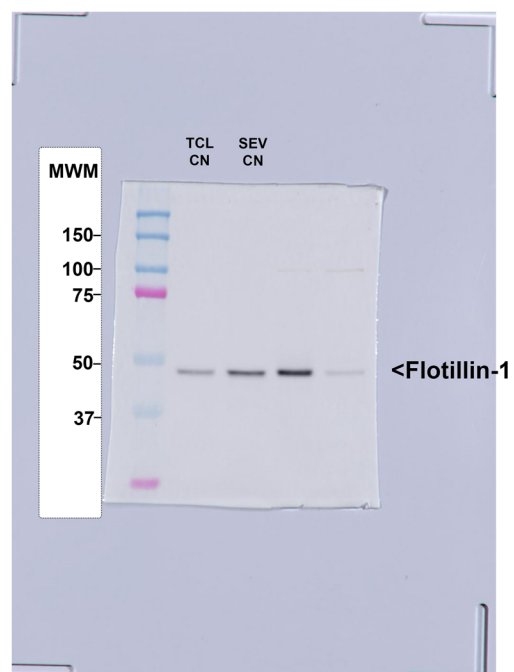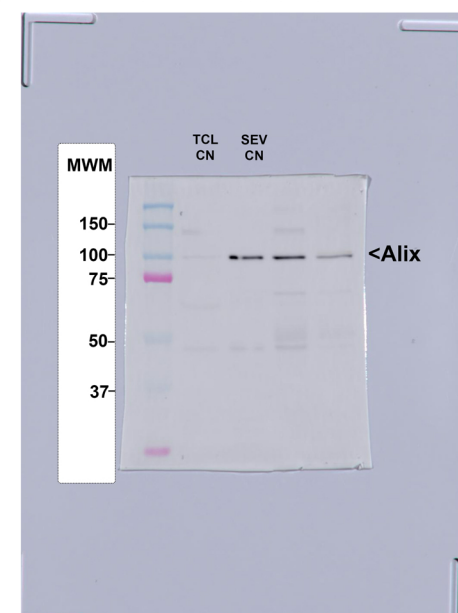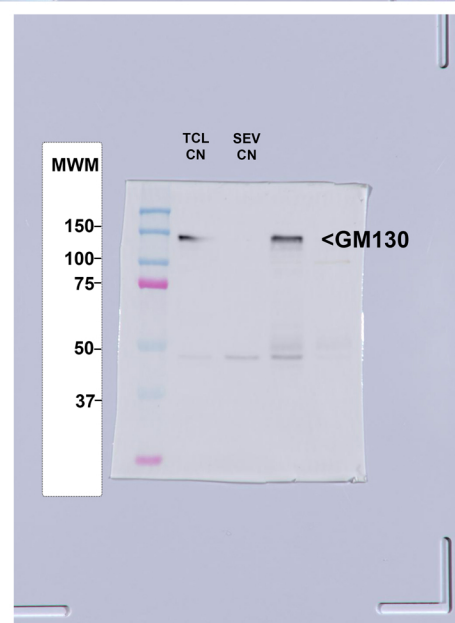

**Figure 3, Figure Supplement 2, Source data 1.** Original membranes corresponding to Figure 3 Figure Supplement 2, panel F. Rainbow molecular weight markers were employed. Left side of each membrane shows the relevant total cell lysate and small extracellular vesicle samples that are shown in the final figure panels.
