# Supplementary material for: Secreted exosomes induce filopodia formation
Source: eLife journal article supplement (doi:10.7554/elife.101673), 2024-10-18
Supplement: fig4-data3 [file Figure 4_Source Data 3.pdf › Figure 4_Source Data 3.pdf]

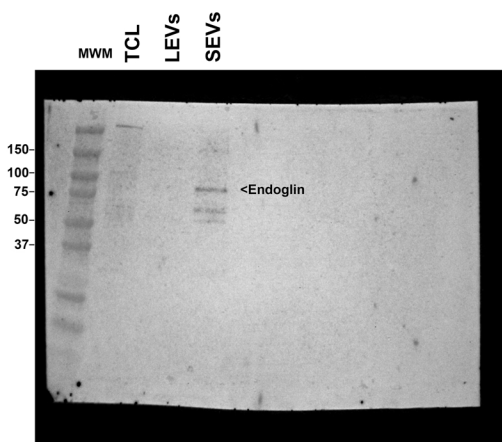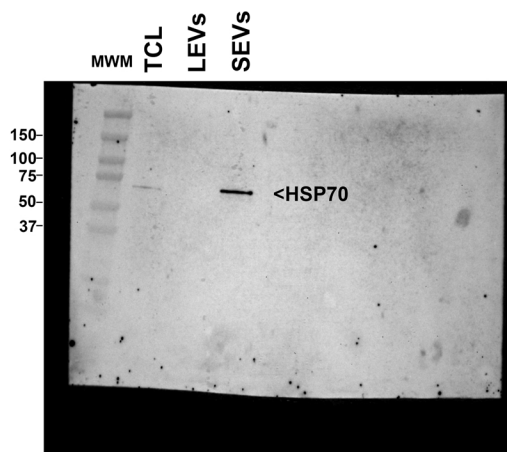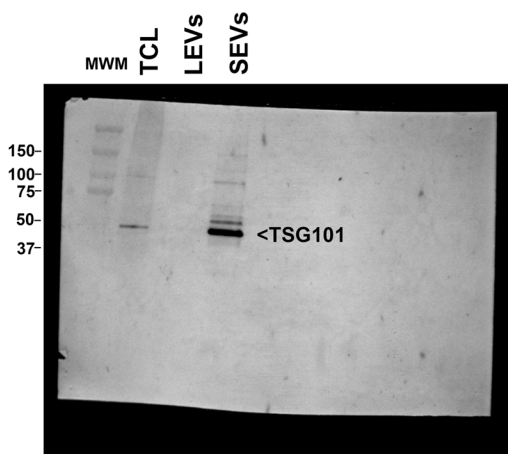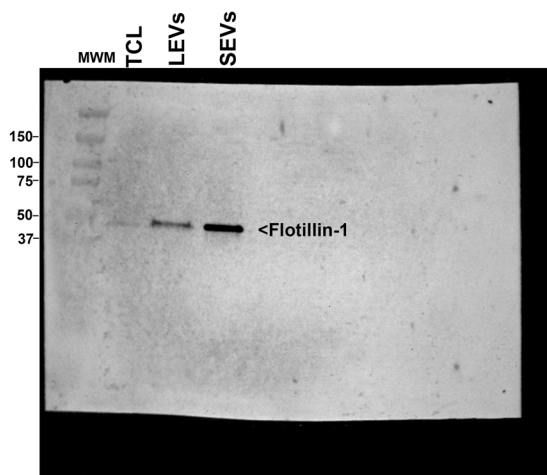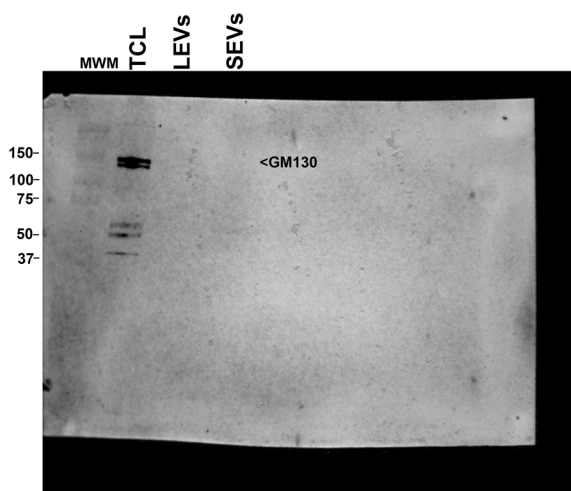

**Figure 4, source data 3.** Original membranes corresponding to Figure 4, panel B. Rainbow molecular weight markers were employed. Samples are total cell lysates, large extracellular vesicles, and small extracellular vesicles.
