# Supplementary material for: Secreted exosomes induce filopodia formation
Source: eLife journal article supplement (doi:10.7554/elife.101673), 2024-10-18
Supplement: fig4-data5 [file Figure 4_Source Data 5.pdf › Figure 4_Source Data 5.pdf]

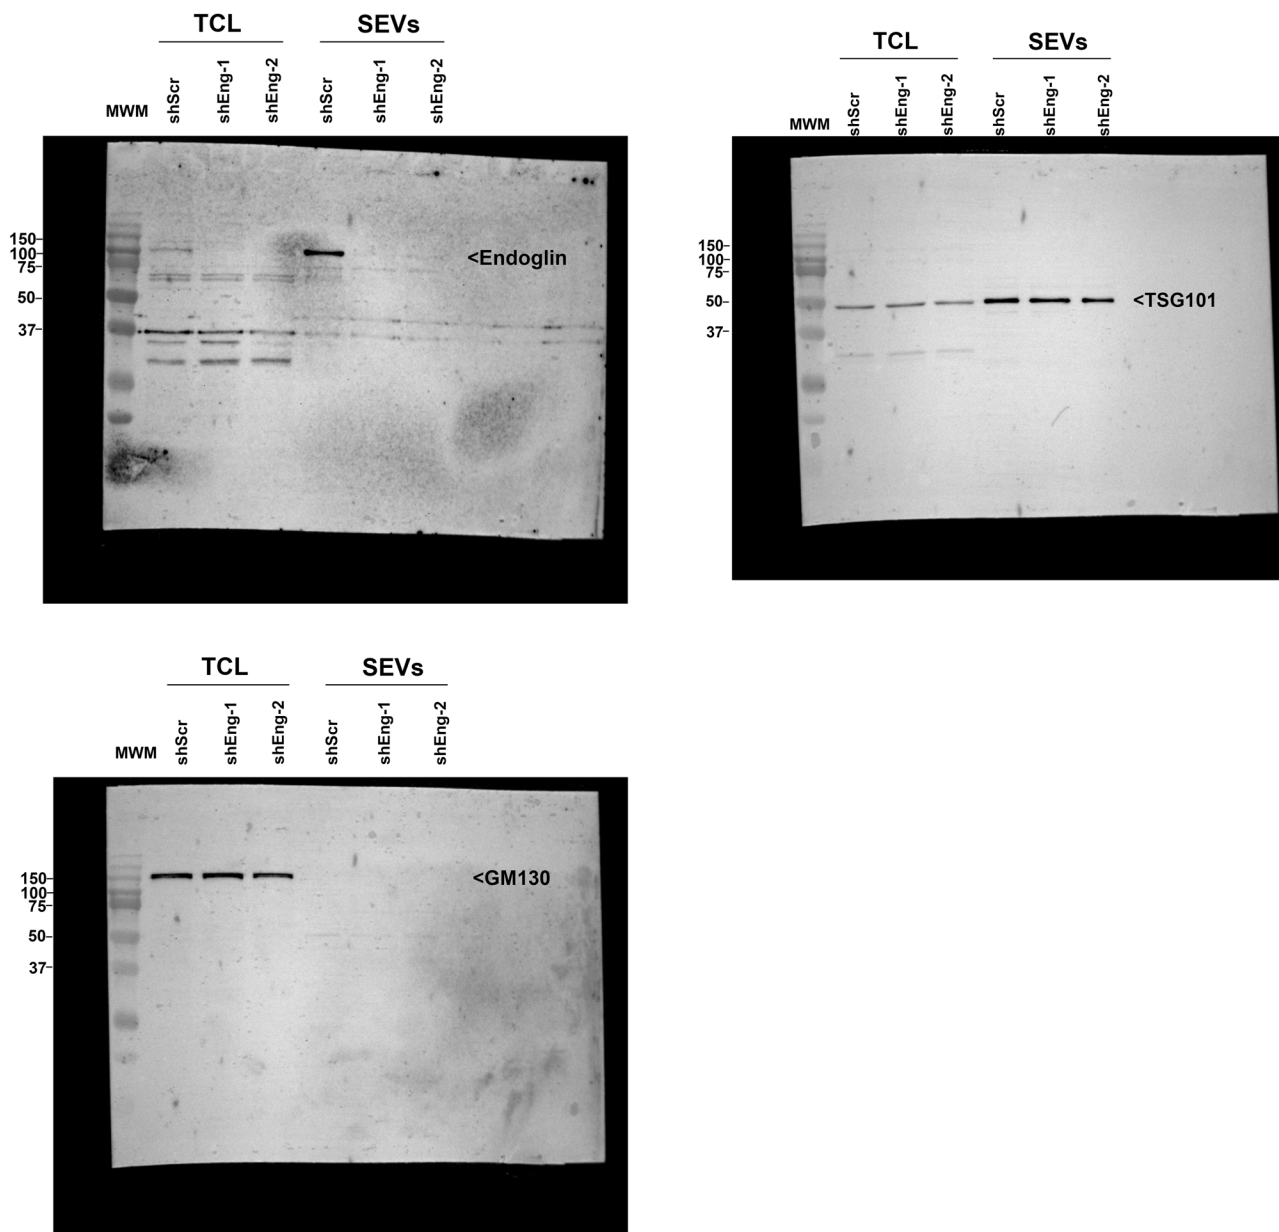

**Figure 4, Source Data 5.** Original membranes corresponding to Figure 4, panel C. Rainbow molecular weight markers were employed. Samples are total cell lysate and small extracellular vesicles from control and endoglin knockdown cells.
