# Supplementary material for: Secreted exosomes induce filopodia formation
Source: eLife journal article supplement (doi:10.7554/elife.101673), 2024-10-18
Supplement: fig4-figsupp1-data1 [file Figure 4_Figure Supplement 1_Source Data 1.pdf › Figure 4_Figure Supplement 1_Source Data 1.pdf]

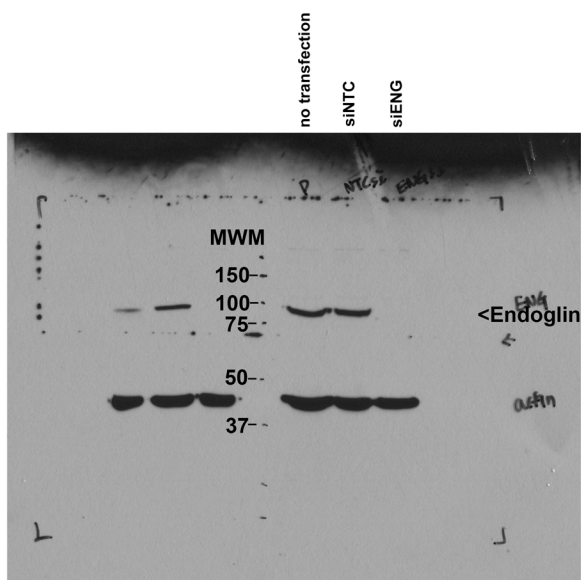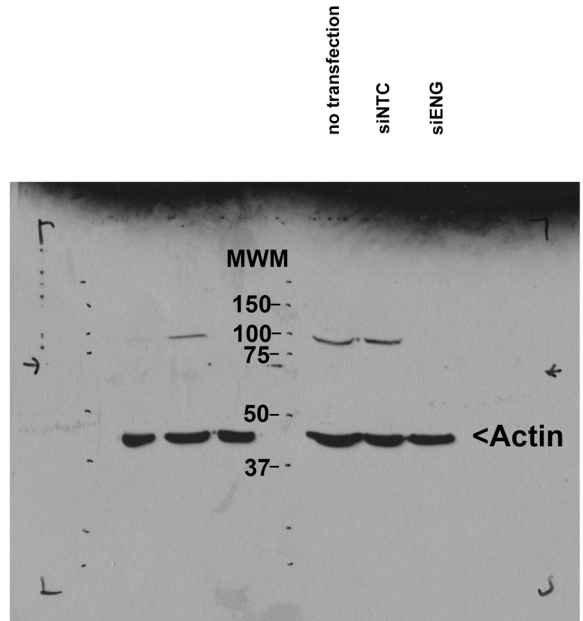

**Figure 4, Figure Supplement 1, Source Data 1.** Original exposures on film of membranes corresponding to Figure 4 Figure Supplement 1, panel C. Rainbow molecular weight markers were employed. Right side of each film shows relevant total cell lysates that are shown in the final figure panels.
