# Supplementary material for: Secreted exosomes induce filopodia formation
Source: eLife journal article supplement (doi:10.7554/elife.101673), 2024-10-18
Supplement: fig4-figsupp2-data1 [file Figure 4_Figure Supplement 2_Source Data 1.pdf › Figure 4_Figure Supplement 2_Source Data 1.pdf]

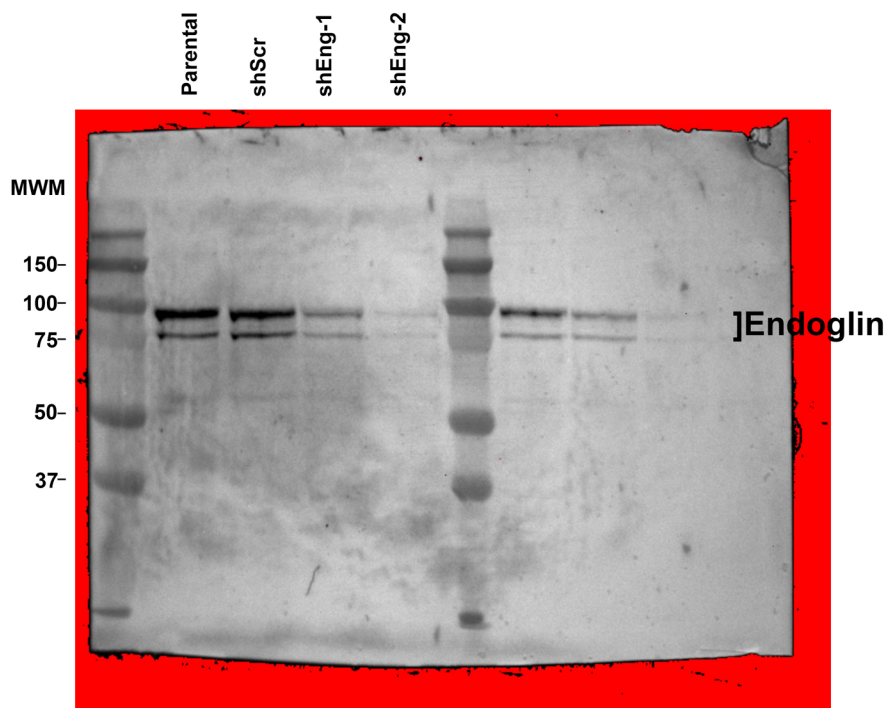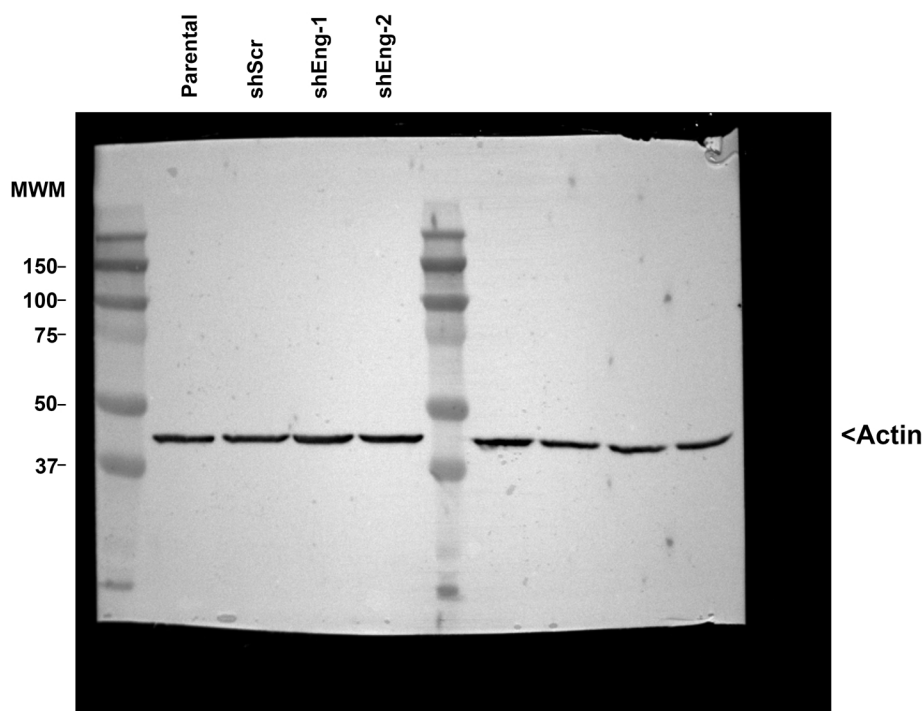

**Figure 4, Figure supplement 2, Source data 1.** Original membranes corresponding to Figure 4 Figure Supplement 2, panel A. Rainbow molecular weight markers were employed. Left side of the membranes shows the relevant total cell lysate samples that were shown in the final figure panels.
