# Supplementary material for: Secreted exosomes induce filopodia formation
Source: eLife journal article supplement (doi:10.7554/elife.101673), 2024-10-18
Supplement: fig6-data1 [file Figure 6_Source Data 1.pdf › Figure 6_Source Data 1.pdf]

Note: contrast increased for figure

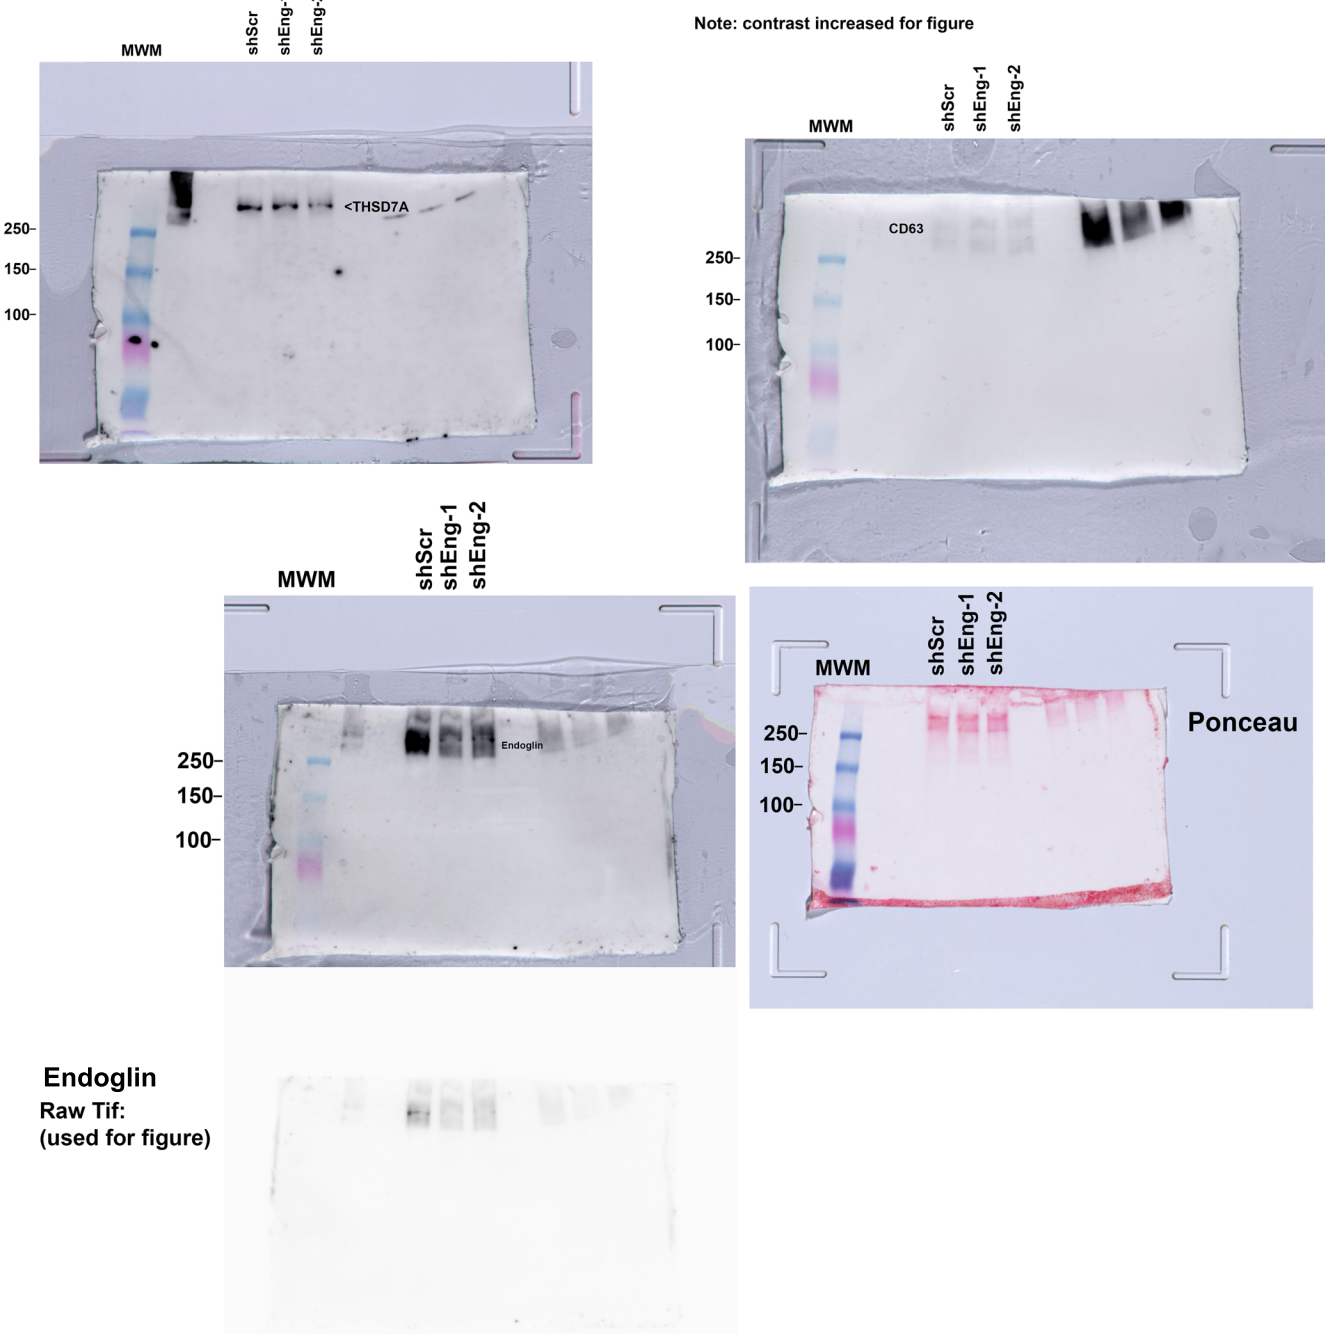

**Figure 6 Source Data 1.** Original membranes corresponding to Figure 6, panel A. Rainbow molecular weight markers were employed. Relevant total cell lysate samples are labeled above membranes. Last membrane shows the total protein using Ponceau stain.
