# Supplementary material for: Secreted exosomes induce filopodia formation
Source: eLife journal article supplement (doi:10.7554/elife.101673), 2024-10-18
Supplement: fig6-data5 [file Figure 6_Source Data 5.pdf › Figure 6_Source Data 5.pdf]

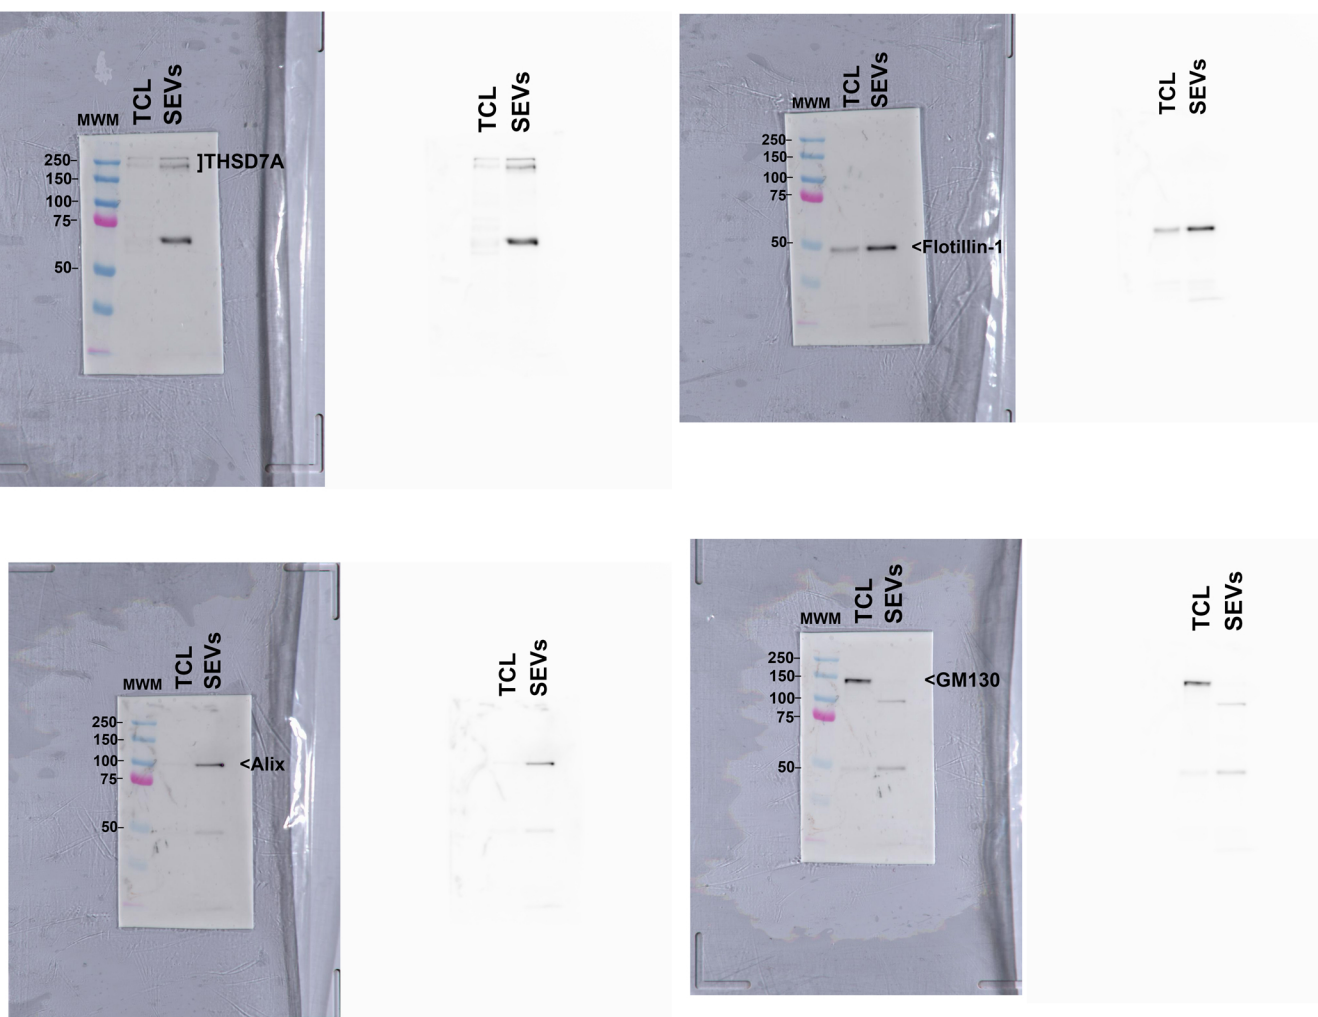

**Figure 6, Source Data 5.** Original membranes corresponding to Figure 6, panel C. Rainbow molecular weight markers were employed. Membrane scans shown as TIF only (right images) and TIF with the molecular weight marker scan overlayed (left images).
