# Supplementary material for: Secreted exosomes induce filopodia formation
Source: eLife journal article supplement (doi:10.7554/elife.101673), 2024-10-18
Supplement: fig8-figsupp1-data1 [file Figure 8_Figure Supplement 1_Source Data 1.pdf › Figure 8_Figure Supplement 1_Source Data 1.pdf]

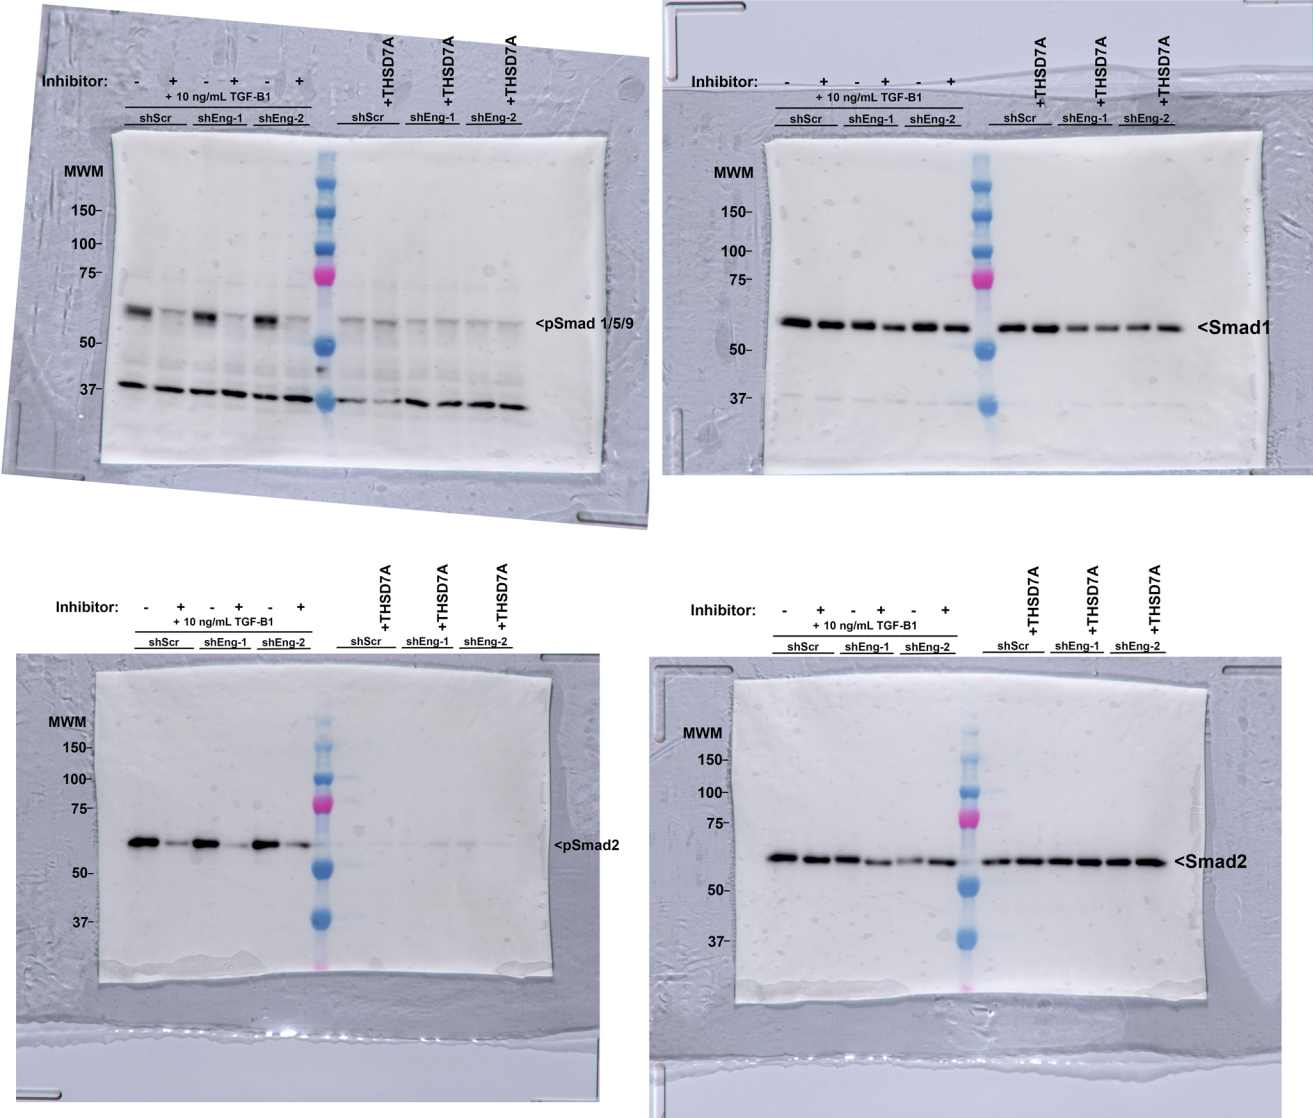

**Figure 8, Figure Supplement 1, Source Data 1.** Original membranes corresponding to Figure 8 Figure Supplement 1. Rainbow molecular weight markers were employed. Labels above blots denote the relevant total cell lysate samples and treatment conditions.
